# Supplementary material for: Long noncoding RNA SNHG6 promotes proliferation and angiogenesis of cholangiocarcinoma cells through sponging miR-101-3p and activation of E2F8
Source: PubMed Central journal article supplement (PMC7086249; doi:10.7150/jca.40592), 2020-03-04
Supplement: jcav11p3002s1.pdf [file jcav11p3002s1.pdf]

## Primers

|            | Forward primer                  | Reverse primer            |
|------------|---------------------------------|---------------------------|
| β-actin    | TGGCACCCAGCACAATGAA             | CTAAGTCATAGTCCGCCTAGAAGCA |
| SNHG6      | TTCTCGGCATCCACATTTGCTC          | CAGGCGGGTCTTATGAGAGAGA    |
| CDKN2C     | GGGGACCTAGAGCAACTTACT           | CAGCGCAGTCCTTCCAAAT       |
| CDKN2D     | AGTCCAGTCCATGACGCAG             | ATCAGGCACGTTGACATCAGC     |
| CDKN2A     | ATGGAGCCTTCGGCTGACT             | GTA ACTATTTCGGTGC GTTGGG  |
| CDK4       | ATGGCTACCTCTCGATATGAGC          | CATTGGGGACTCTCACACTCT     |
| CDK1       | AAACTACAGGTCAAGTGGTAGCC         | TCCTGCATAAGCACATCCTGA     |
| CDK2       | GTACCTCCCCTGGATGAAGAT           | CGAAATCCGCTTGTTAGGGTC     |
| CDK6       | CCAGATGGCTCTAACCTCAGT           | AACTTCCACGAAAAGAGGCTT     |
| cyclinA    | TGGAAAGCAAACAGTAAACAGCC         | GGGCATCTTCACGCTCTATTT     |
| cyclinB    | TTGGGGACATTGGTAACAAAGTC         | ATAGGCTCAGGCGAAAGTTTTT    |
| cyclin D   | GCTGCGAAGTGGAAACCATC            | CCTCCTTCTGCACACATTTGAA    |
| cyclinE    | GCCAGCCTTGGGACAATAATG           | CTTGCACGTTGAGTTTGGGT      |
| GTSE1      | CCACCGGGATGTTCTCCCT             | TTCAGCCCCAACTTGTTTGGGA    |
| E2F2       | CATCCAGCTCATCCGCAAGAAGG         | CGGCTCCTGCACCTCCTCTG      |
| E2F8       | CCTGAGATCCGCAACAGAGAT           | AGATGTCATTATTCACAGCAGGG   |
| U6         | CTCGCTTCGGCAGCACA               |                           |
| miR-186-5p | GCGCAAAGAATTCTCCTTTTGGGCT       |                           |
| miR-101-3p | GCGGCGTACAGTACTGTGATAACTGAA     |                           |
| miR-543    | ACACTCCAGCTGGGAAACATTCGCGGTGCAC |                           |

Sequences

|                      | 5'-3'                 | 5'-3'                 |
|----------------------|-----------------------|-----------------------|
| Si-NC                | UUCUCCGAACGUGUCACGUTT | ACGUGACACGUUCGGAGAATT |
| Si-SNHG6-1#          | GAAGGUGUAUGAAAGUCAUTT | AUGACUUUCAUACACCUUCTT |
| Si-SNHG6-2#          | CGGCAUGUAUUGAGCAUAUTT | AUAUGCUCAAUACAUGCCGTT |
| mimics control       | UUCUCCGAACGUGUCACGUTT | ACGUGACACGUUCGGAGAATT |
| miR-101-3p mimics    | UACAGUACUGUGAUAACUGAA | CAGUUAUCACAGUACUGUAUU |
| inhibitor control    | CAGUACUUUUGUGUAGUACAA |                       |
| miR-101-3p inhibitor | UUCAGUUAUCACAGUACUGUA |                       |
